# Supplementary material for: Projection of Future Mortality Due to Temperature and Population Changes under Representative Concentration Pathways and Shared Socioeconomic Pathways
Source: PubMed Central journal article supplement (PMC5923864; doi:10.3390/ijerph15040822), 2018-04-21
Supplement: ijerph-15-00822-s001.pdf [file ijerph-15-00822-s001.pdf]

# Projection of Future Mortality Due to Temperature and Population Changes under Representative Concentration Pathways and Shared Socioeconomic Pathways

Jae Young Lee <sup>1</sup>, Ejin Kim <sup>1</sup>, Woo-Seop Lee <sup>2</sup>, Yeora Chae <sup>3</sup> and Ho Kim <sup>1,\*</sup>

<sup>1</sup> Institute of Health and Environment and Graduate School of Public Health, Seoul National University, 1, Gwanak-ro, Gwanak-gu, Seoul 08826, Korea; jaeyoung.lee@alumni.stanford.edu (J.Y.L.); platin@snu.ac.kr (E.K.)

<sup>2</sup> Climate Research Department, APEC Climate Center, 12, Centum 7-ro, Haeundae-gu, Busan 48058, Korea; wslee@apcc21.org

<sup>3</sup> Korea Environment Institute, 370 Sicheong-daero, Sejong 30147, Korea; yrchae@kei.re.kr

\* Correspondence: hokim@snu.ac.kr; Tel.: +82-2-880-2711

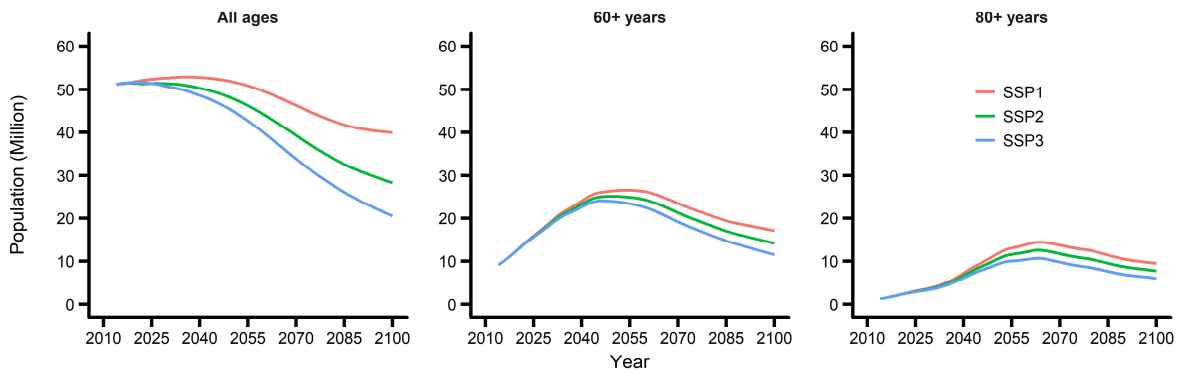

**Figure S1.** Overall population changes based on SSP scenarios for all, more than 60 years old and 80 years old.

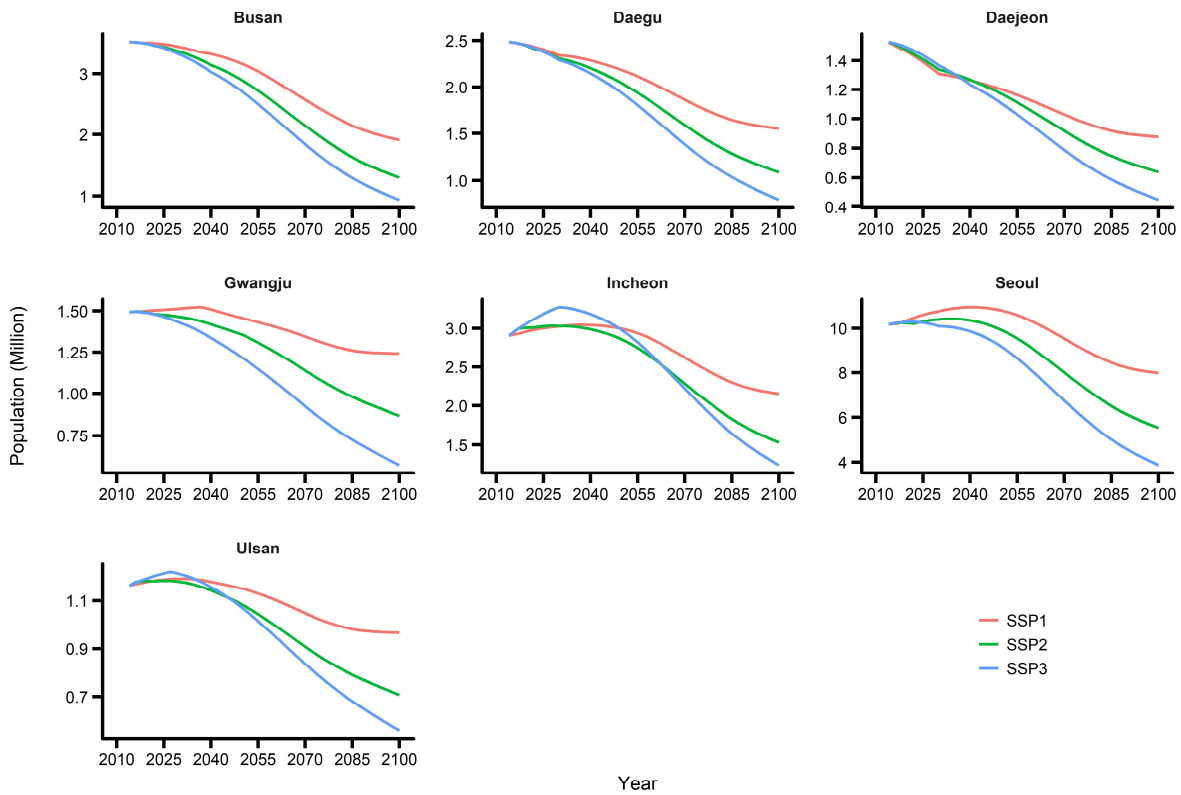

**Figure S2.** Projection of population changes based on SSP scenarios in seven major cities of South Korea.

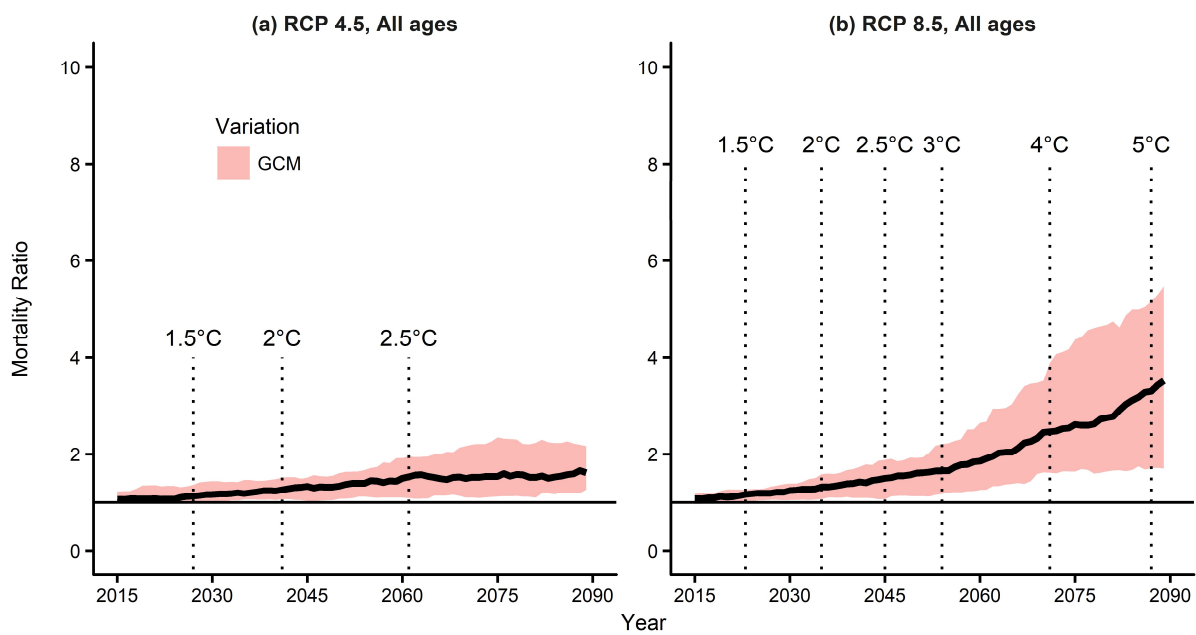

**Figure S3.** Mortality ratio due to only temperature change under (a) RCP 4.5 and (b) 8.5 for total population.

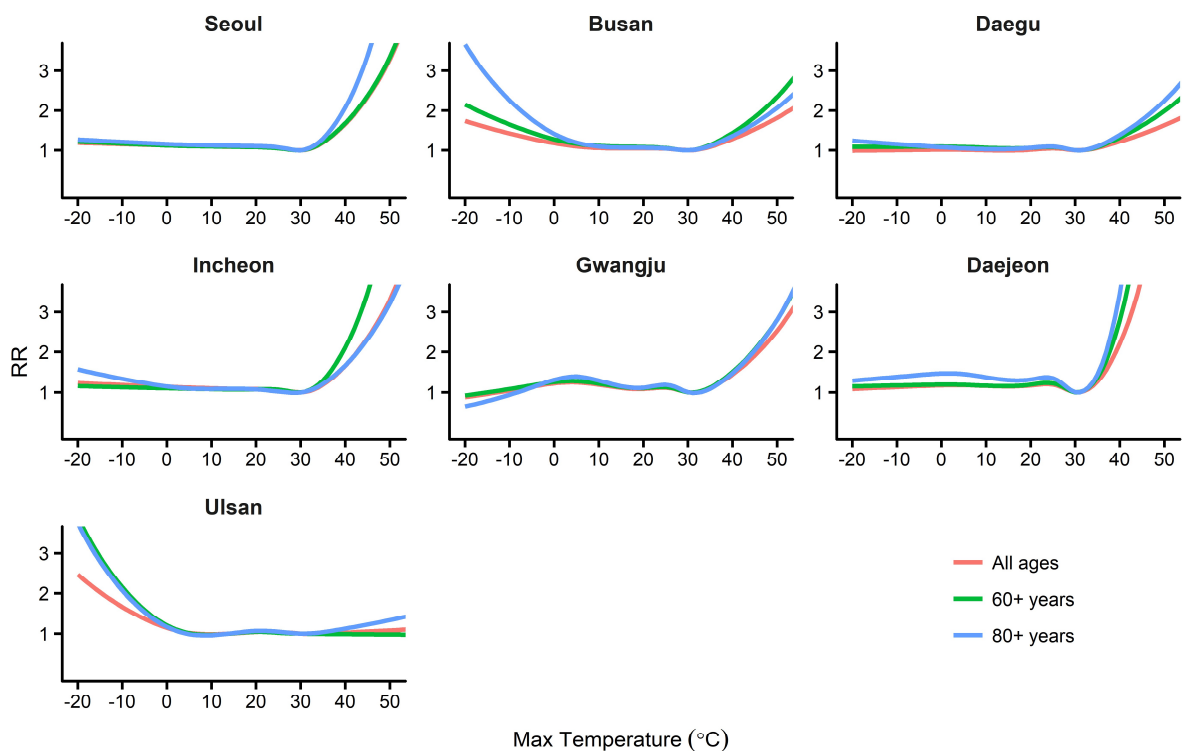

**Figure S4.** Association between temperature and mortality in seven major cities of South Korea.

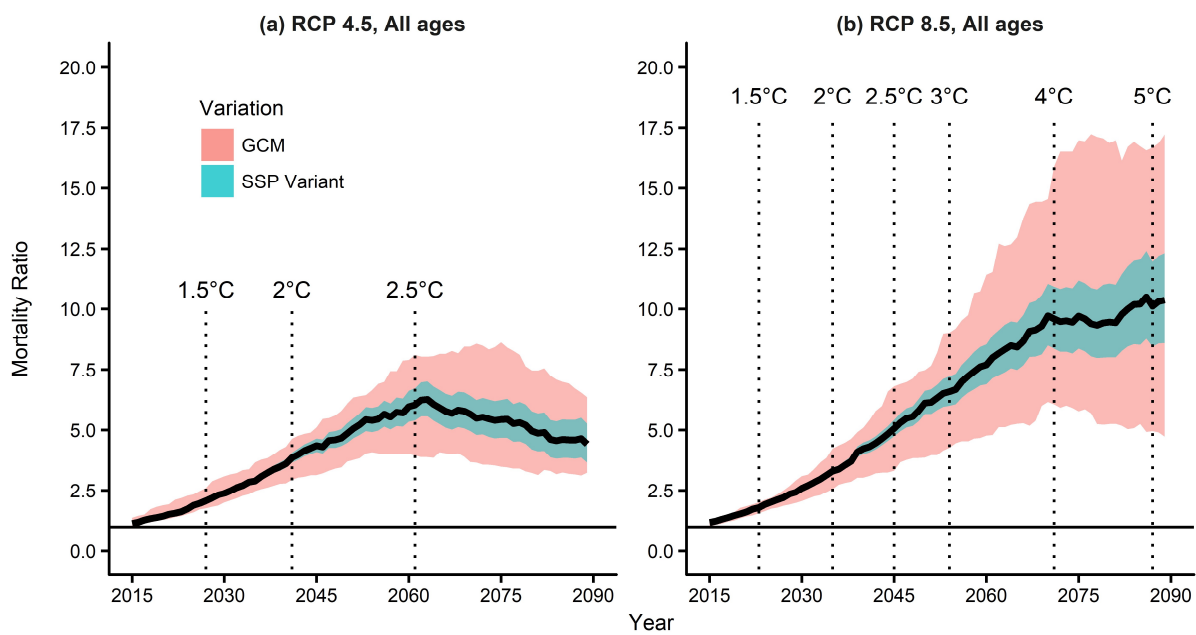

**Figure S5.** Mortality ratio due to temperature and population changes under (a) RCP 4.5 and (b) 8.5 for total population.

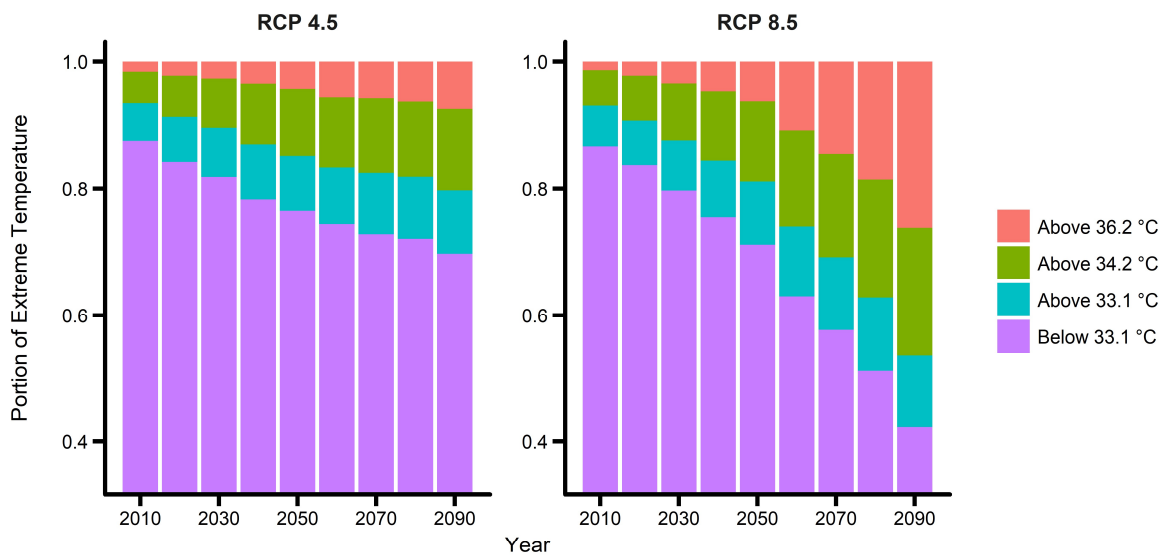

**Figure S6.** Portion of baseline 90-, 95-, 99-percentile temperatures (33.1°C, 34.2°C, and 36.2°C) due to temperature change.

**Table S1.** The population of seven major cities of South Korea in 2015.

| City    | Population (Millions) | Ratio |
|---------|-----------------------|-------|
| Seoul   | 10.21                 | 19.9% |
| Busan   | 3.52                  | 6.9%  |
| Daegu   | 2.48                  | 4.8%  |
| Incheon | 2.94                  | 5.7%  |
| Gwangju | 1.50                  | 2.9%  |
| Daejeon | 1.52                  | 3.0%  |
| Ulsan   | 1.17                  | 2.3%  |

**Table S2.** The mortality ratios (MRs) according to temperature changes only.

| Temperature Increase | RCP 4.5     |          |          |          | RCP 8.5     |          |          |          |
|----------------------|-------------|----------|----------|----------|-------------|----------|----------|----------|
|                      | Period      | MR (All) | MR (60+) | MR (80+) | Period      | MR (All) | MR (60+) | MR (80+) |
| 1.5 °C               | 2027        | 1.13     | 1.20     | 1.12     | 2023        | 1.17     | 1.23     | 1.16     |
|                      | (2023-2032) |          |          |          | (2019-2028) |          |          |          |
| 2 °C                 | 2041        | 1.26     | 1.44     | 1.25     | 2035        | 1.32     | 1.48     | 1.34     |
|                      | (2037-2046) |          |          |          | (2031-2040) |          |          |          |
| 2.5 °C               | 2061        | 1.53     | 1.75     | 1.60     | 2045        | 1.50     | 1.71     | 1.57     |
|                      | (2057-2066) |          |          |          | (2041-2050) |          |          |          |
| 3 °C                 | -           | -        | -        | -        | 2054        | 1.65     | 1.94     | 1.77     |
|                      | -           | -        | -        | -        | (2050-2059) |          |          |          |
| 4 °C                 | -           | -        | -        | -        | 2071        | 2.46     | 3.08     | 2.74     |
|                      | -           | -        | -        | -        | (2067-2076) |          |          |          |
| 5 °C                 | -           | -        | -        | -        | 2087        | 3.30     | 4.23     | 3.74     |
|                      | -           | -        | -        | -        | (2083-2092) |          |          |          |

**Table S3.** The mortality ratios (MRs) according to temperature and population changes.

| Temperature Increase | RCP 4.5             |          |          | RCP 8.5  |                     |          |          |          |
|----------------------|---------------------|----------|----------|----------|---------------------|----------|----------|----------|
|                      | Period              | MR (All) | MR (60+) | MR (80+) | Period              | MR (All) | MR (60+) | MR (80+) |
| 1.5 °C               | 2027<br>(2023-2032) | 2.07     | 2.55     | 3.01     | 2023<br>(2019-2028) | 1.78     | 2.14     | 2.45     |
| 2 °C                 | 2041<br>(2037-2046) | 3.85     | 5.04     | 7.57     | 2035<br>(2031-2040) | 3.30     | 4.23     | 6.04     |
| 2.5 °C               | 2061<br>(2057-2066) | 6.04     | 8.07     | 16.35    | 2045<br>(2041-2050) | 5.06     | 6.68     | 11.61    |
| 3 °C                 | -                   | -        | -        | -        | 2054<br>(2050-2059) | 6.59     | 8.80     | 16.93    |
| 4 °C                 | -                   | -        | -        | -        | 2071<br>(2067-2076) | 9.60     | 12.93    | 26.83    |
| 5 °C                 | -                   | -        | -        | -        | 2087<br>(2083-2092) | 10.12    | 13.66    | 28.56    |
